# Supplementary material for: Association of Maternal Dietary Patterns during Gestation and Offspring Neurodevelopment
Source: MDPI journal article supplement (doi:10.3390/nu14040730), 2022-02-09
Supplement: s1 [file s1]

**Supplemental Table S1. Pearson correlation coefficients between FFQ and 3–day 24HR completed by 141 pregnant women in the second trimester.**

| Daily food intakes (g/d)     | FFQ                | 3–day 24HR         | TE adjusted and de-attenuated† | <i>p</i> †† |
|------------------------------|--------------------|--------------------|--------------------------------|-------------|
| Refined cereals              | 4.48 (3.99, 4.66)  | 4.29 (3.94, 4.68)  | 0.21                           | 0.011       |
| Eggs                         | 4.60 (3.84, 4.96)  | 4.14 (3.75, 4.42)  | 0.40                           | <0.001      |
| Meat                         | 5.13 (4.33, 5.45)  | 4.38 (3.90, 4.71)  | 0.40                           | <0.001      |
| Beans                        | 3.43 (2.00, 4.34)  | 3.30 (1.28, 4.46)  | 0.32                           | <0.001      |
| Sweets                       | 2.80 (1.35, 3.54)  | 2.93 (0.74, 3.65)  | 0.39                           | <0.001      |
| Citrus                       | 2.45 (0.20, 3.52)  | 2.18 (0.04, 4.39)  | 0.51                           | <0.001      |
| Nut                          | 2.35 (0.84, 3.20)  | 1.37 (0.15, 2.95)  | 0.42                           | <0.001      |
| Homonemeae                   | 2.48 (1.37, 2.97)  | 1.28 (0.06, 2.79)  | 0.22                           | 0.007       |
| Dairy                        | 5.70 (5.14, 6.06)  | 5.10 (4.47, 5.56)  | 0.59                           | <0.001      |
| Fried food                   | 0.53 (0.10, 1.94)  | 0.05 (−0.03, 0.15) | 0.14                           | 0.092       |
| Tubers and Whole grains      | 3.49 (2.88, 4.15)  | 4.65 (4.17, 5.13)  | 0.16                           | 0.056       |
| Haslet                       | 2.04 (0.62, 2.78)  | 0.06 (−0.03, 1.96) | 0.27                           | 0.001       |
| Shells and Molluscs          | 0.10 (−0.01, 0.68) | 0.09 (−0.12, 0.22) | 0.23                           | 0.006       |
| Aquatic products             | 3.76 (3.30, 4.23)  | 3.87 (3.15, 4.56)  | 0.21                           | 0.011       |
| Fresh vegetables             | 4.42 (4.09, 4.65)  | 4.87 (4.45, 5.32)  | 0.20                           | 0.016       |
| Pome, Berry and Melon fruits | 5.50 (5.22, 5.86)  | 5.45 (5.19, 5.85)  | 0.33                           | <0.001      |

†Pearson correlation coefficients between average intakes of energy and nutrients from FFQ and those obtained from 3-day 24HR, respectively.

††P Value of Pearson correlation coefficients after energy adjustment and de attenuation.

FFQ, food frequency questionnaire; 24HR, 24-hour dietary recall; TE, total energy.

**Supplemental Table S2. Dietary patterns identified by PCA and factor loadings of food groups/items\* included in each dietary pattern for the pregnant woman in her second and third trimesters (n=1,178).**

| Dietary Pattern              |                                               |                                                                 |        |          |                                         |                                            |          |        |
|------------------------------|-----------------------------------------------|-----------------------------------------------------------------|--------|----------|-----------------------------------------|--------------------------------------------|----------|--------|
|                              | the second trimester                          |                                                                 |        |          | the third trimester                     |                                            |          |        |
|                              | ‘Haslet,<br>Beans,<br>Shells and<br>Molluscs’ | ‘Aquatic<br>products,<br>Fresh<br>vegetables and<br>Homonemeae’ | ‘Nut’  | ‘Sweets’ | ‘Aquatic<br>products and<br>Homonemeae’ | ‘Pome,<br>Berry<br>and<br>Melon<br>fruits’ | ‘Citrus’ | ‘Nut’  |
| Food items                   |                                               |                                                                 |        |          |                                         |                                            |          |        |
| Refined cereals              |                                               |                                                                 | −0.544 |          |                                         |                                            |          |        |
| Eggs                         |                                               |                                                                 |        |          |                                         |                                            |          |        |
| Meat                         |                                               |                                                                 |        | −0.629   |                                         |                                            |          | −0.801 |
| Beans                        | 0.532                                         |                                                                 |        |          |                                         |                                            |          |        |
| Sweets                       |                                               |                                                                 |        | 0.652    |                                         |                                            |          |        |
| Citrus                       |                                               |                                                                 |        |          |                                         |                                            | 0.629    |        |
| Nut                          |                                               |                                                                 | 0.605  |          |                                         |                                            |          | 0.643  |
| Homonemeae                   |                                               | 0.513                                                           |        |          | 0.671                                   |                                            |          |        |
| Dairy                        |                                               |                                                                 |        |          |                                         |                                            |          |        |
| Fried food                   |                                               |                                                                 |        |          |                                         |                                            |          |        |
| Tubers and Whole grains      |                                               |                                                                 |        |          |                                         | −0.522                                     |          |        |
| Haslet                       | 0.589                                         |                                                                 |        |          |                                         |                                            |          |        |
| Shells and Molluscs          | 0.561                                         |                                                                 |        |          |                                         |                                            |          |        |
| Aquatic products             |                                               | 0.686                                                           |        |          | 0.675                                   |                                            |          |        |
| Fresh vegetables             |                                               | 0.705                                                           |        |          |                                         |                                            | −0.524   |        |
| Pome, Berry and Melon fruits |                                               |                                                                 |        |          |                                         | 0.683                                      |          |        |
| Variance explained (%)       | 9.800                                         | 9.700                                                           | 8.600  | 8.600    | 10.000                                  | 9.900                                      | 9.500    | 8.700  |

Abbreviations: PCA, principal component analysis.

\*Only food groups/items with factor loadings >0.50 or <−0.5 were retained for each factor.

**Supplemental Table S3. Comparison between characteristics of eligible mothers who completed the FFQ at both trimesters and those who did not complete as requested\*.**

|                                    |           | Included ( <i>n</i> = 1178) | Not included ( <i>n</i> = 1257) | <i>p</i> |
|------------------------------------|-----------|-----------------------------|---------------------------------|----------|
| Maternal characteristics           |           |                             |                                 |          |
| Maternal age at delivery (years)   |           | 31.01 (3.92)                | 31.05 (3.90)                    | 0.845    |
| Maternal pre-pregnancy BMI (kg/m2) |           |                             |                                 |          |
|                                    | <18.5     | 127 (10.8)                  | 164 (13.0)                      | 0.480    |
|                                    | 18.5–23.9 | 807 (68.5)                  | 832 (66.2)                      |          |
|                                    | 24–27.9   | 189 (16.0)                  | 197 (15.7)                      |          |
|                                    | ≥28       | 46 (3.9)                    | 52 (4.1)                        |          |
| Diabetes <sup>a</sup>              |           | 339 (28.8)                  | 308 (25.3)                      | 0.059    |
| Hypertension <sup>b</sup>          |           | 60 (5.1)                    | 58 (4.8)                        | 0.793    |
| Mode of conception                 |           |                             |                                 |          |
|                                    | SP        | 707 (60.0)                  | 689 (54.8)                      | 0.011    |
|                                    | ARTP      | 471 (40.0)                  | 568 (45.2)                      |          |
| Primipara                          |           | 915 (77.7)                  | 975 (77.6)                      | 0.626    |
| Infants characteristics            |           |                             |                                 |          |
| Preterm birth                      |           | 45 (3.8)                    | 91 (7.2)                        | <0.001   |
| Infant sex                         |           |                             |                                 |          |
|                                    | Male      | 612 (52.0)                  | 675 (53.7)                      | 0.060    |
|                                    | Female    | 566 (48.0)                  | 577 (45.9)                      |          |
| LBW (<2500 g) <sup>c</sup>         |           | 27 (2.3)                    | 64 (5.1)                        | 0.001    |
| Duration of breastfeeding, months  |           |                             |                                 |          |
|                                    | <6        | 406 (34.5)                  | 327 (26.0)                      | <0.001   |
|                                    | 6–12      | 754 (64.0)                  | 512 (40.7)                      |          |

\* Data are presented as mean (SD) or n (%). *P* values obtained by independent t-test or chi-square analysis.

Abbreviations: BMI = body mass index;

SP = spontaneous pregnancy;

ARTP = assisted reproductive technology pregnancy.

<sup>a</sup> Diabetes includes chronic and gestational diabetes.

<sup>b</sup> Hypertension includes chronic, gestational and pre-eclampsia.

<sup>c</sup> Low birth weight.

**Supplemental Table S4. Distribution of similar dietary pattern scores across gestation.**

| Dietary Pattern                                     | Median (IQR)         |                      | ICC (95% CI)         |
|-----------------------------------------------------|----------------------|----------------------|----------------------|
|                                                     | Second trimester     | Third trimester      |                      |
| ‘Aquatic products, Fresh vegetables and Homonemeae’ | 9.27 (8.33, 10.01)   | 10.71 (9.66, 11.65)  | 0.461 (0.407, 0.510) |
| ‘Nut’                                               | −1.15 (−2.11, −0.14) | −1.01 (−2.17, −0.05) | 0.330 (0.260, 0.390) |

IQR, interquartile range; ICC, intraclass correlation coefficient.

**Supplemental Table S5. Multivariable associations between maternal dietary patterns in the second and third trimesters and categorical outcomes of neurodevelopment in infants.**

|                                                     | Cognition                          |              | Receptive communication |          | Expressive communication           |              | Fine motor           |          | Gross motor                        |                  |
|-----------------------------------------------------|------------------------------------|--------------|-------------------------|----------|------------------------------------|--------------|----------------------|----------|------------------------------------|------------------|
|                                                     | RR<br>(95%CI)                      | <i>p</i>     | RR<br>(95%CI)           | <i>p</i> | RR<br>(95%CI)                      | <i>p</i>     | RR<br>(95%CI)        | <i>p</i> | RR<br>(95%CI)                      | <i>p</i>         |
| Second trimester                                    |                                    |              |                         |          |                                    |              |                      |          |                                    |                  |
| ‘Haslet, Beans, Shells and Molluscs’                |                                    |              |                         |          |                                    |              |                      |          |                                    |                  |
| Model1                                              | 0.95<br>(0.87, 1.04)               | 0.294        | 1.01<br>(0.94, 1.09)    | 0.758    | 0.95<br>(0.82, 1.08)               | 0.422        | 0.91<br>(0.78, 1.06) | 0.216    | 0.99<br>(0.90, 1.08)               | 0.759            |
| Model2                                              | 0.99<br>(0.90, 1.09)               | 0.811        | 1.00<br>(0.93, 1.09)    | 0.912    | 0.93<br>(0.81, 1.08)               | 0.338        | 0.94<br>(0.80, 1.10) | 0.416    | 1.02<br>(0.92, 1.13)               | 0.684            |
| ‘Aquatic products, Fresh vegetables and Homonemeae’ |                                    |              |                         |          |                                    |              |                      |          |                                    |                  |
| Model1                                              | <b>0.84</b><br><b>(0.75, 0.93)</b> | <b>0.001</b> | 0.98<br>(0.89, 1.08)    | 0.669    | 0.86<br>(0.73, 1.02)               | 0.079        | 0.88<br>(0.72, 1.07) | 0.197    | <b>0.82</b><br><b>(0.73, 0.91)</b> | <b>&lt;0.001</b> |
| Model2                                              | <b>0.84</b><br><b>(0.74, 0.94)</b> | <b>0.003</b> | 1.00<br>(0.90, 1.11)    | 0.993    | 0.95<br>(0.79, 1.14)               | 0.581        | 0.87<br>(0.71, 1.07) | 0.180    | <b>0.80</b><br><b>(0.71, 0.91)</b> | <b>&lt;0.001</b> |
| ‘Nut’                                               |                                    |              |                         |          |                                    |              |                      |          |                                    |                  |
| Model1                                              | 0.98<br>(0.88, 1.09)               | 0.683        | 0.94<br>(0.86, 1.03)    | 0.201    | <b>0.78</b><br><b>(0.66, 0.92)</b> | <b>0.004</b> | 1.13<br>(0.95, 1.35) | 0.167    | 0.99<br>(0.88, 1.11)               | 0.882            |
| Model2                                              | 1.02<br>(0.91, 1.13)               | 0.781        | 0.95<br>(0.86, 1.04)    | 0.253    | <b>0.79</b><br><b>(0.66, 0.94)</b> | <b>0.008</b> | 1.16<br>(0.97, 1.38) | 0.107    | 1.04<br>(0.93, 1.17)               | 0.458            |
| ‘Sweets’                                            |                                    |              |                         |          |                                    |              |                      |          |                                    |                  |
| Model1                                              | 1.00<br>(0.89, 1.12)               | 0.970        | 1.05<br>(0.96, 1.15)    | 0.311    | 1.09<br>(0.91, 1.29)               | 0.356        | 1.04<br>(0.85, 1.26) | 0.706    | 1.05<br>(0.94, 1.19)               | 0.384            |
| Model2                                              | 0.98<br>(0.87, 1.10)               | 0.700        | 1.04<br>(0.95, 1.15)    | 0.386    | 1.08<br>(0.91, 1.29)               | 0.376        | 1.05<br>(0.87, 1.27) | 0.622    | 1.02<br>(0.91, 1.14)               | 0.770            |
| Third trimester                                     |                                    |              |                         |          |                                    |              |                      |          |                                    |                  |

|                                   |                                    |              |                                    |              |                      |       |                      |       |                      |       |
|-----------------------------------|------------------------------------|--------------|------------------------------------|--------------|----------------------|-------|----------------------|-------|----------------------|-------|
| ‘Aquatic products and Homonemeae’ |                                    |              |                                    |              |                      |       |                      |       |                      |       |
| Model1                            | 0.91<br>(0.82, 1.00)               | 0.051        | <b>0.92</b><br><b>(0.85, 0.99)</b> | <b>0.037</b> | 0.91<br>(0.79, 1.05) | 0.206 | 0.99<br>(0.82, 1.18) | 0.886 | 0.92<br>(0.83, 1.02) | 0.115 |
| Model2                            | <b>0.89</b><br><b>(0.80, 0.98)</b> | <b>0.016</b> | <b>0.91</b><br><b>(0.84, 0.99)</b> | <b>0.022</b> | 0.91<br>(0.78, 1.06) | 0.236 | 0.99<br>(0.82, 1.21) | 0.934 | 0.94<br>(0.84, 1.04) | 0.235 |
| ‘Pome, Berry and Melon fruits’    |                                    |              |                                    |              |                      |       |                      |       |                      |       |
| Model1                            | 0.96<br>(0.86, 1.08)               | 0.536        | 0.99<br>(0.89, 1.09)               | 0.826        | 1.06<br>(0.88, 1.28) | 0.542 | 0.96<br>(0.80, 1.16) | 0.687 | 1.02<br>(0.90, 1.16) | 0.779 |
| Model2                            | 0.91<br>(0.81, 1.03)               | 0.131        | 0.93<br>(0.84, 1.04)               | 0.200        | 1.00<br>(0.82, 1.22) | 0.975 | 0.96<br>(0.78, 1.18) | 0.695 | 0.99<br>(0.87, 1.13) | 0.905 |
| ‘Citrus’                          |                                    |              |                                    |              |                      |       |                      |       |                      |       |
| Model1                            | 1.02<br>(0.93, 1.12)               | 0.638        | 1.00<br>(0.93, 1.09)               | 0.905        | 1.03<br>(0.90, 1.19) | 0.664 | 0.92<br>(0.78, 1.08) | 0.297 | 0.91<br>(0.83, 1.01) | 0.070 |
| Model2                            | 1.04<br>(0.95, 1.15)               | 0.387        | 1.02<br>(0.94, 1.10)               | 0.670        | 1.05<br>(0.91, 1.21) | 0.532 | 0.92<br>(0.77, 1.09) | 0.306 | 0.92<br>(0.84, 1.02) | 0.116 |
| ‘Nut’                             |                                    |              |                                    |              |                      |       |                      |       |                      |       |
| Model1                            | 1.02<br>(0.91, 1.14)               | 0.750        | 1.04<br>(0.94, 1.14)               | 0.444        | 0.97<br>(0.82, 1.15) | 0.717 | 1.11<br>(0.92, 1.34) | 0.277 | 0.99<br>(0.88, 1.11) | 0.805 |
| Model2                            | 1.02<br>(0.91, 1.14)               | 0.758        | 1.04<br>(0.95, 1.14)               | 0.422        | 0.97<br>(0.81, 1.15) | 0.683 | 1.12<br>(0.93, 1.36) | 0.223 | 1.00<br>(0.89, 1.12) | 0.984 |

Model 1: adjusted for mode of conception, maternal age, maternal pre-pregnancy BMI, parity, hypertension, diabetes, gestational week at delivery, infant sex, duration of breastfeeding.

Model 2: adjusted for mode of conception, maternal age, maternal pre-pregnancy BMI, parity, hypertension, diabetes, gestational week at delivery, infant sex, duration of breastfeeding, principal component score of maternal dietary intake, folic acid supplements.

Abbreviations: BMI = body mass index.

Statistically significant differences are highlighted in bold.
